# Supplementary material for: Intelligent Photosensitive Mesenchymal Stem Cells and Cell-Derived Microvesicles for Photothermal Therapy of Prostate Cancer
Source: PubMed Central journal article supplement — Nanotheranostics. 2019 Jan 1;3(1):41–53. doi: 10.7150/ntno.28450 (PMC6328305; doi:10.7150/ntno.28450), 2019-01-01
Supplement: ntnov03p0041s1.pdf [file ntnov03p0041s1.pdf]

## Supplementary Materials

### Intelligent Photosensitive Mesenchymal Stem Cells and Cell-Derived Microvesicles for Photothermal Therapy of Prostate Cancer

Liqun Huang<sup>a</sup>, Chang Xu<sup>b</sup>, Peng Xu<sup>c</sup>, Yu Qin<sup>d</sup>, Mengwei Chen<sup>b</sup>, Qishuai Feng<sup>b</sup>, Jing Pan<sup>d</sup>, Qian Cheng<sup>d</sup>, Feng Liang<sup>c</sup>, Xiaofei Wen<sup>\*a</sup>, Ying Wang<sup>e</sup>, Yufang Shi<sup>e</sup>, Yu Cheng<sup>\*b</sup>

<sup>a</sup> Department of Urology, Shanghai East Hospital, Tongji University School of Medicine, Shanghai, 200120, China.

<sup>b</sup> Shanghai East Hospital; The Institute for Biomedical Engineering & Nano Science, Tongji University School of Medicine, Shanghai, 200120, China.

<sup>c</sup> The State Key Laboratory of Refractories and Metallurgy, School of Chemistry and Chemical Engineering, Wuhan University of Science and Technology, Wuhan 430081, China.

<sup>d</sup> Institute of Acoustics, Tongji University, Siping Road 1239, Shanghai 200092, China.

<sup>e</sup> Key Laboratory of Stem Cell Biology, Institute of Health Sciences, Shanghai Institutes for Biological Sciences, Chinese Academy of Sciences/Shanghai Jiao Tong University School of Medicine, Shanghai, China.

Corresponding authors: wenxiaofei2000@hotmail.com; yucheng@tongji.edu.cn

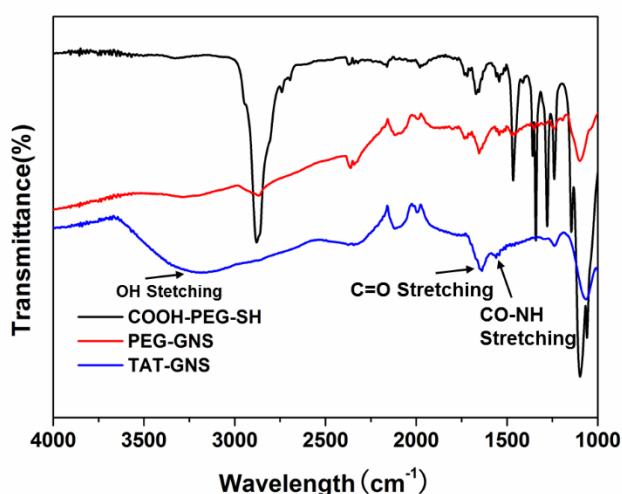

**Fig. S1** The Fourier transform infrared (FT-IR) spectra of the naked PEG (black curve), PEG-GNS (red curve) and TAT-GNS (blue curve). The appearance of a weak and broad band at 3200-3400 cm<sup>-1</sup> is attributed to the presence of -OH groups on the surface of PEG-GNS. The 1638.1 cm<sup>-1</sup> and 1577.1 cm<sup>-1</sup> peaks are assigned to the C=O stretching (amide I) and the asymmetric stretching mode in the CO-NH group.

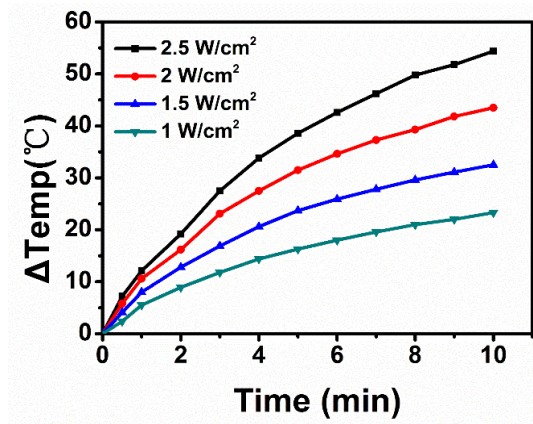

Fig. S2  $\Delta T$ -t curves of TAT-GNS (160 pM) with various laser irradiation intensity.

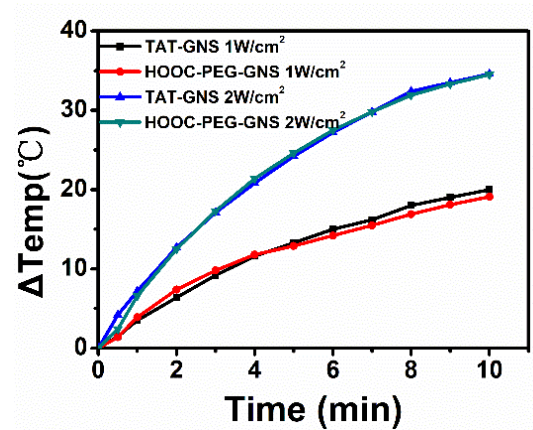

Fig. S3  $\Delta T$ -t curve of TAT-GNS with different surface modification. Laser irradiation intensity of 2 W/cm<sup>2</sup>.

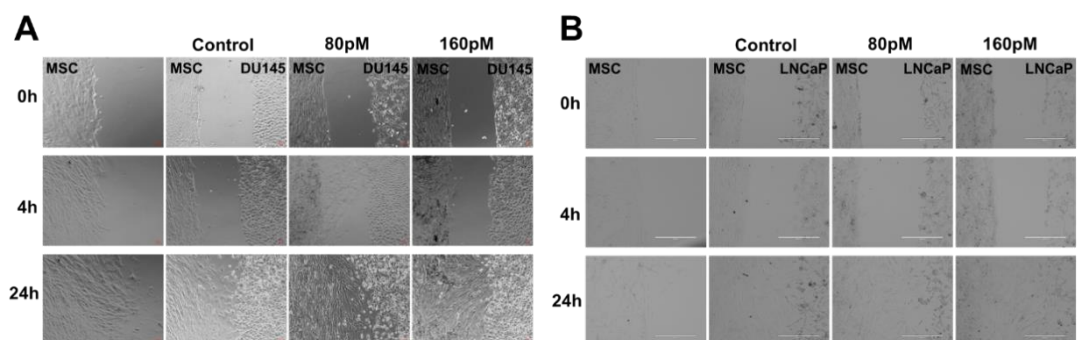

Fig. S4 Migration of GNS-loaded MSCs to DU145 and LNCaP cells.

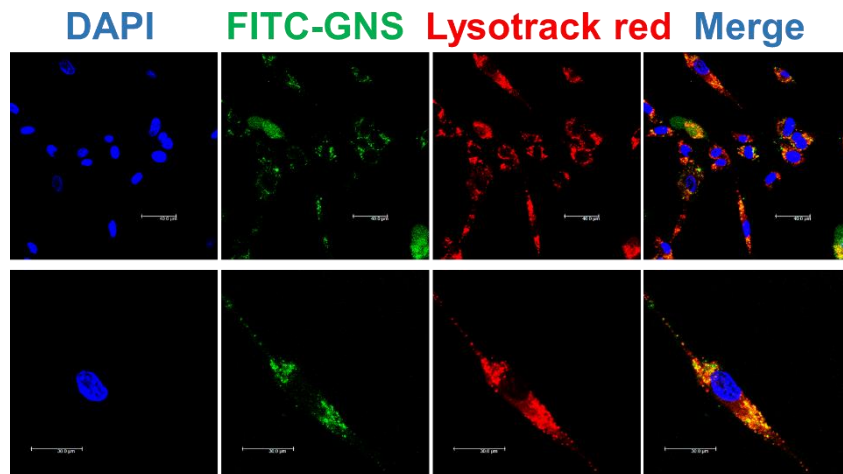

**Fig. S5** Laser scanning confocal microscopy images of the FITC-TAT-GNS loaded MSCs.

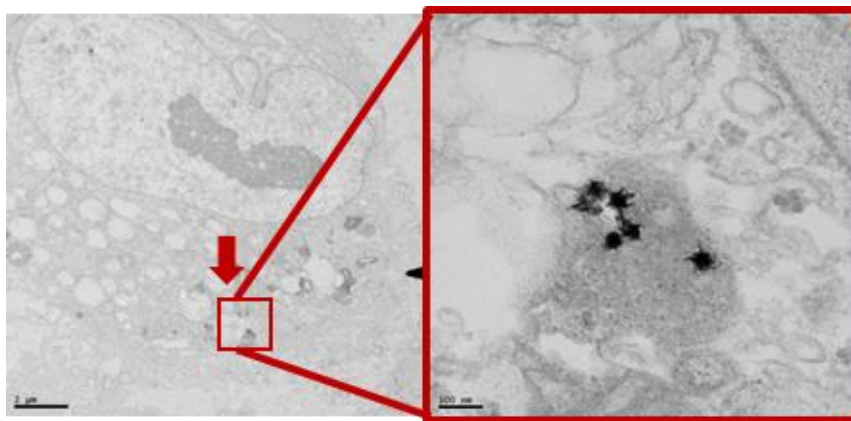

**Fig. S6** TAT-GNS inside the lysosomes of MSCs was further studied by TEM. Representative TEM images of MSCs incubated with TAT-GNS for 4 hours. Only some sporadic gold nanostars were observed in intracellular vesicles after 4 h incubation.

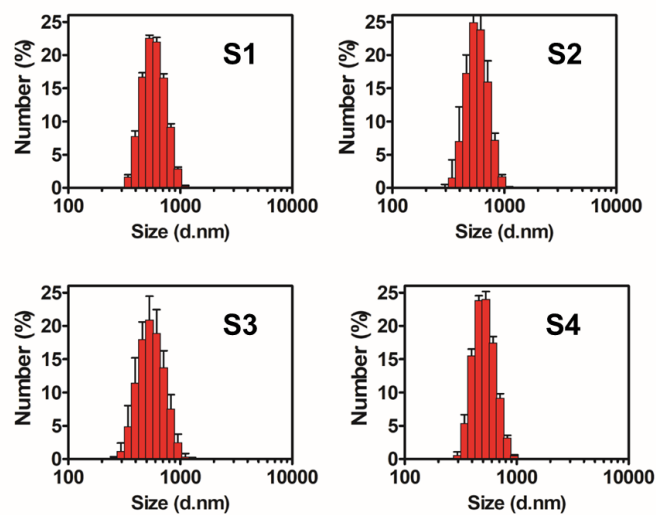

**Fig. S7** DLS of different samples of GNS loaded MSCs supernatant.

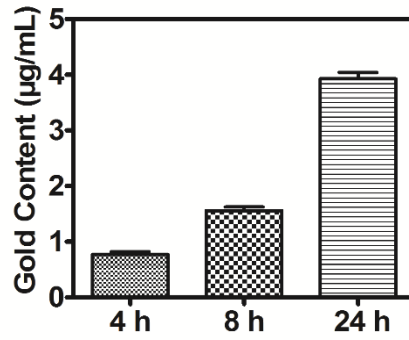

**Fig. S8 ICP-MS of the time dependence gold content released in the supernatant.**

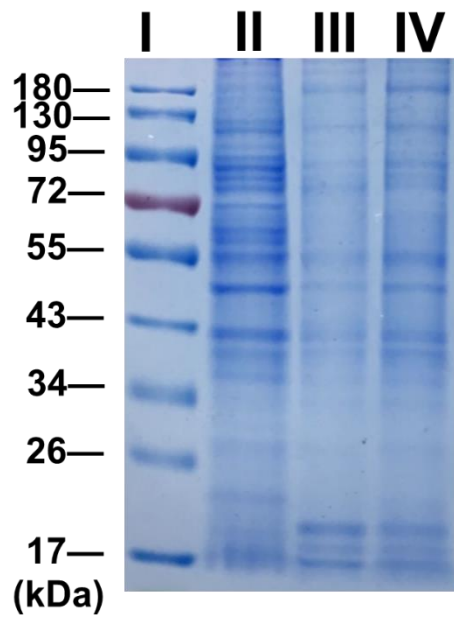

**Fig. S9 SDS-PAGE protein analysis of microvesicles containing GNS clusters.** Samples were stained with Coomassie brilliant blue. I, markers. II, the cell membrane proteins of MSCs. III, MSCs extracellular vesicles as control. IV, GNS-loaded MSCs extracellular vesicles.

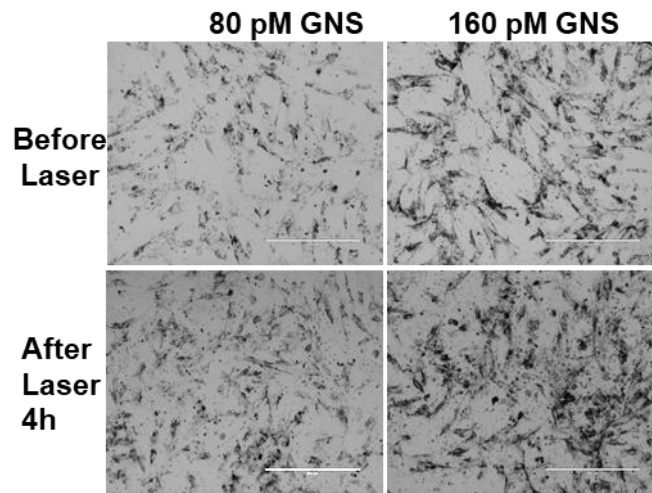

**Fig. S10** Light triggered the GNS clusters released from MSCs (more dark spots could be seen 4 h after light exposure, 2 W/cm<sup>2</sup>, 3 min).

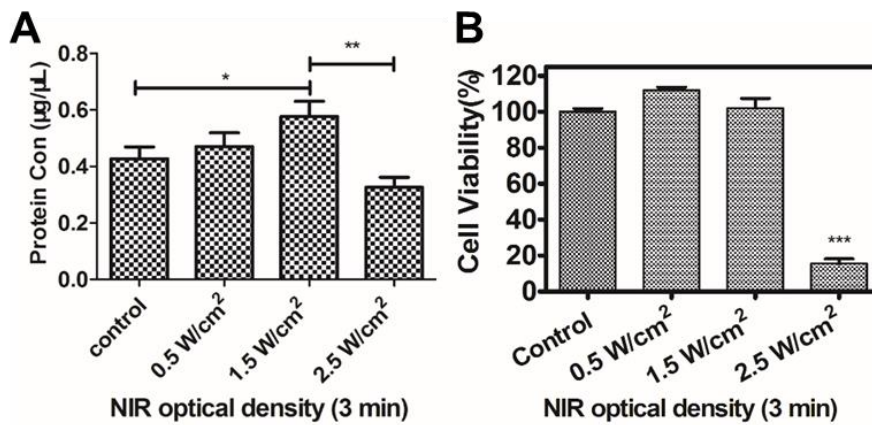

**Fig S11 A**, Protein quantification of supernatant in GNS loaded MSCs by BCA assay 4 h after NIR exposure (range from 0.5 W/cm<sup>2</sup> to 2.5 W/cm<sup>2</sup>, 3 min). The concentration of TAT-GNS was 160 pM. **B**, the cell viability of MSCs under the NIR exposure (range from 0.5 W/cm<sup>2</sup> to 2.5 W/cm<sup>2</sup>, 3 min).

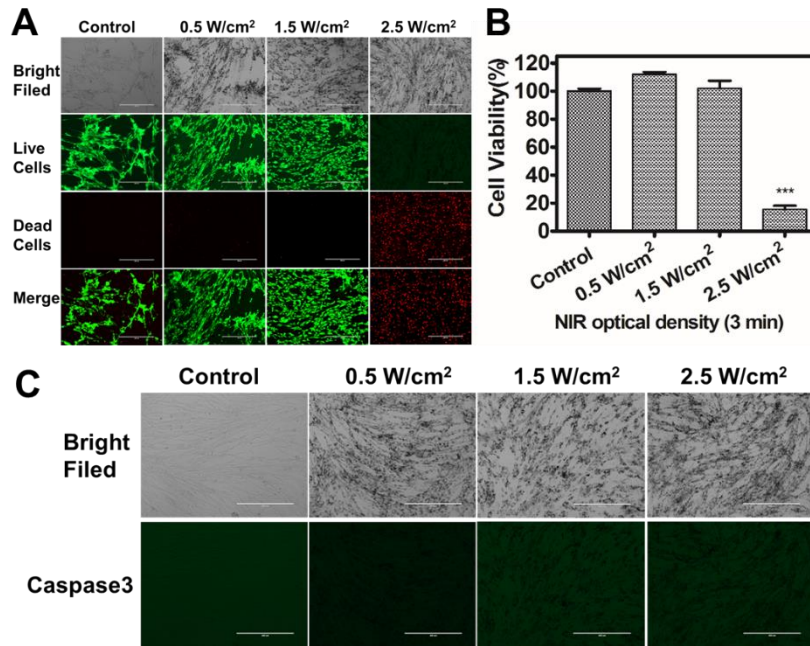

**Fig. S12** *In vitro* PTT effect of GNS-loaded MSCs in a NIR optical density dependence manner. A. PTT effects on GNS-loaded MSCs with different MSC optical density (ranging from 0.5 W/cm<sup>2</sup> to 2.5 W/cm<sup>2</sup>). Representative 10× images obtained 4 hours after laser exposure (Live–dead staining with PI and calcein-AM); B, Cell viability of GNS-loaded MSCs post light irradiation; C, Caspase3 staining 4 hours after laser exposure.

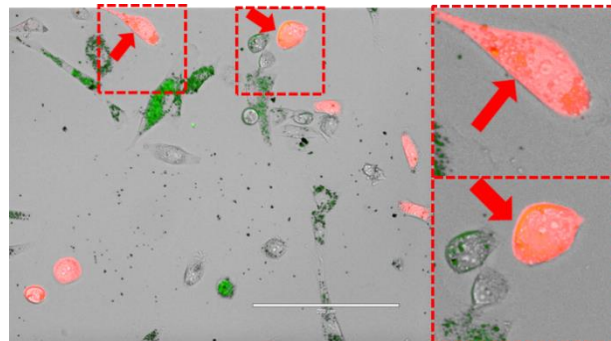

**Fig. S13** FITC labeled GNS clusters released from MSCs to PC-3. The PC-3 cells were labeled by RFP.

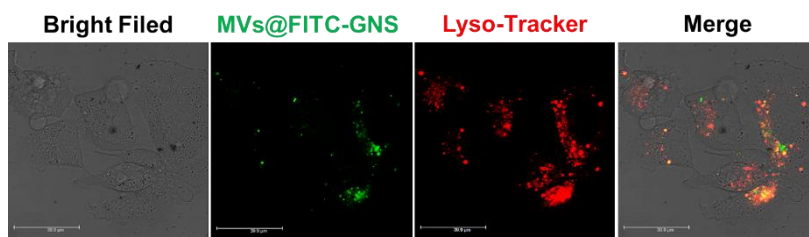

**Fig. S14** Confocal laser scanning microscopy of isolated MVs@FITC-GNS in PC-3 cells. MVs@FITC-GNS could be uptake by PC-3 cells.

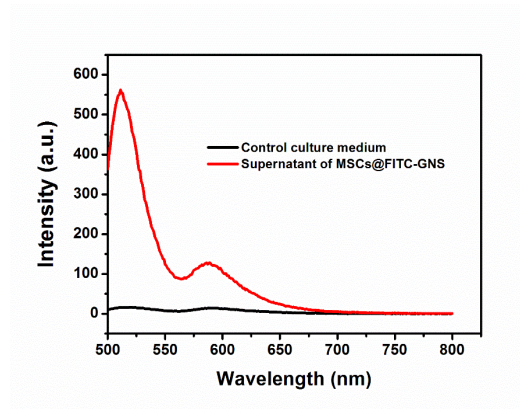

Fig. S15 The fluorescence of the supernatant in MSCs@FITC-TAT-GNS incubated with serum free medium.

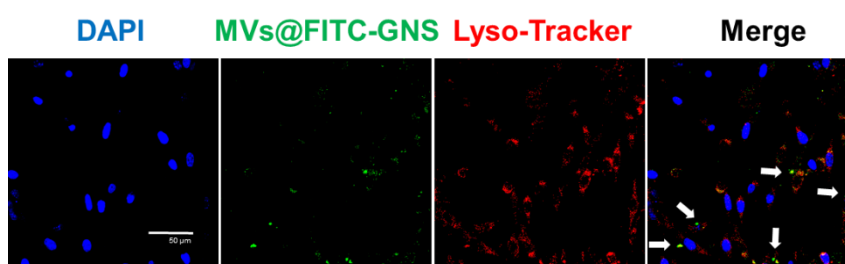

Fig. S16 Confocal laser scanning microscopy of supernatant in MSCs@FITC-TAT-GNS in 3T3 cells. The white arrow shows a majority of the MVs@FITC-GNS were outside of the 3T3 cells.

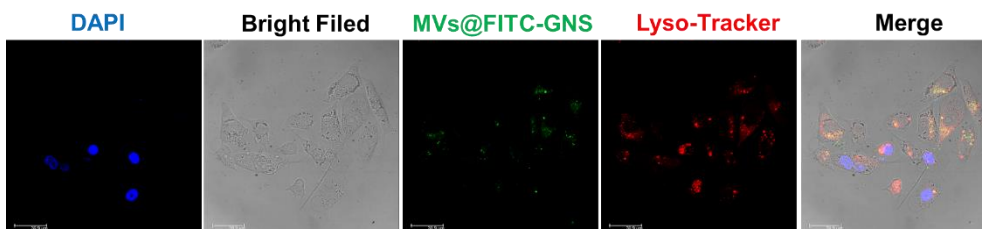

Fig. S17 Confocal laser scanning microscopy of supernatant in MSCs@FITC-TAT-GNS in PC-3 cells. MVs@FITC-GNS could be uptake by PC-3 cells

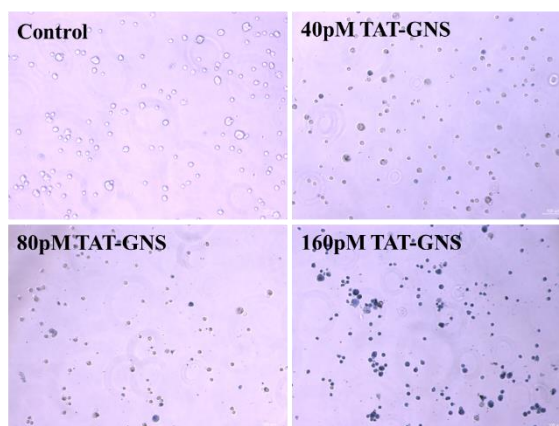

Fig. S18 Trypan blue staining of the GNS-loaded MSCs after the NIR laser exposure.

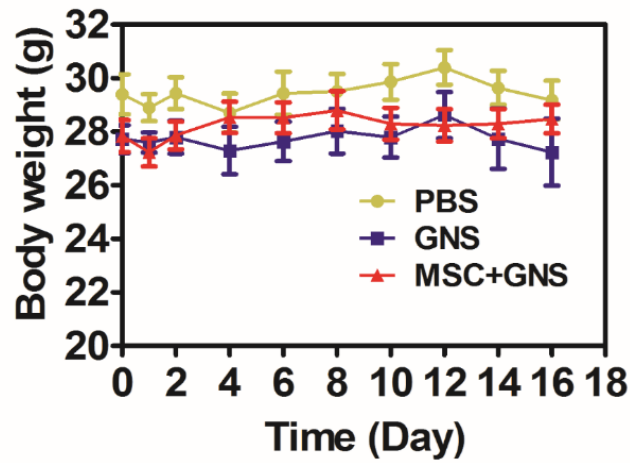

Fig. S19 The body weight variations of PC-3 tumor-bearing mice during treatment (n=5).

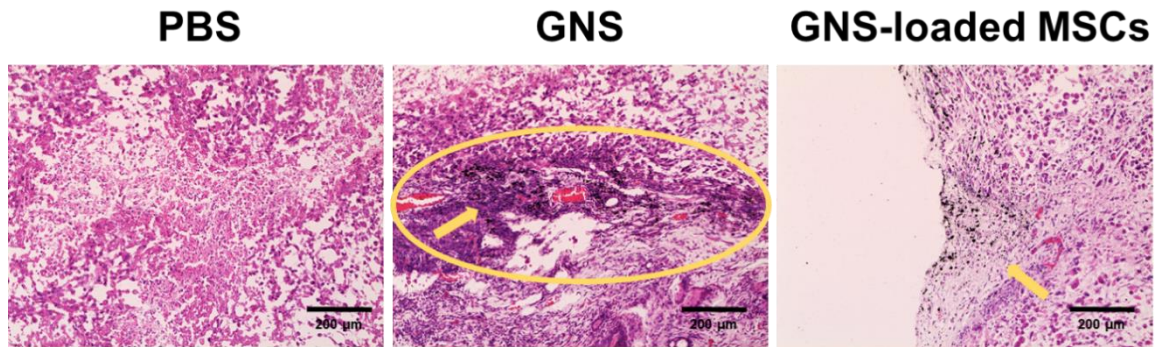

Fig. S20 Representative H&E and silver staining section of the tumor after treatment for 16 days. All scale bars are 200  $\mu$ m.

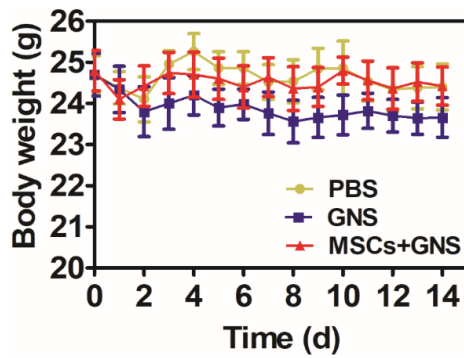

Fig. S21 The body weight variations of PC-3 tumor-bearing mice during treatment (n=5).



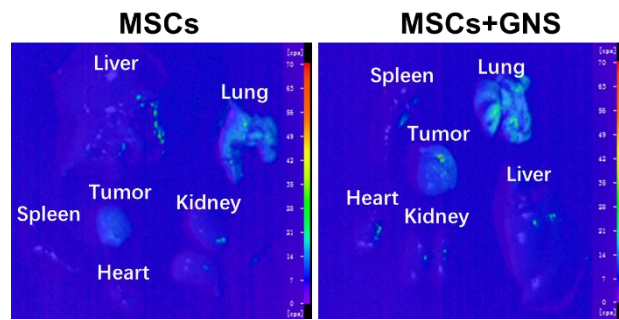

**Fig. S22 Ex vivo fluorescence imaging of the biodistribution of MSCs *in vivo*.**
